# Supplementary material
Source: publisher site journal article supplement (https://www.dovepress.com/get_supplementary_file.php?f=386594.docx)
Supplement: Supplementary file 1 [file get_supplementary_file.php]

**Appendices**

| Interpretation | Fasting Blood glucose level |
| --- | --- |
| Normal | < 5.5 mmol/l |
| Impaired fasting blood glucose | 5.5 mmol/l – 7 mmol/l |
| Diabetic | ˃ 7 mmol/l |

**Reference ranges of biochemical hormones endorsed by the World Health Organization**

Appendix (1)

| Interpretation | Free thyroxine level (T4) |
| --- | --- |
| Normal | 0.8 ng/dl -1.8 ng/dl |
| Low | ˂ 0.8 ng/dl |
| High | ˃ 1.8 ng/dl |

Appendix (2)

| Interpretation | Thyroid stimulating hormone level (TSH) |
| --- | --- |
| Normal | 0.4 mIU/l – 4 mIU/l |
| Low | ˂ 0.4 mIU/l |
| High | ˃ 4 mIU/l |

Appendix (3)


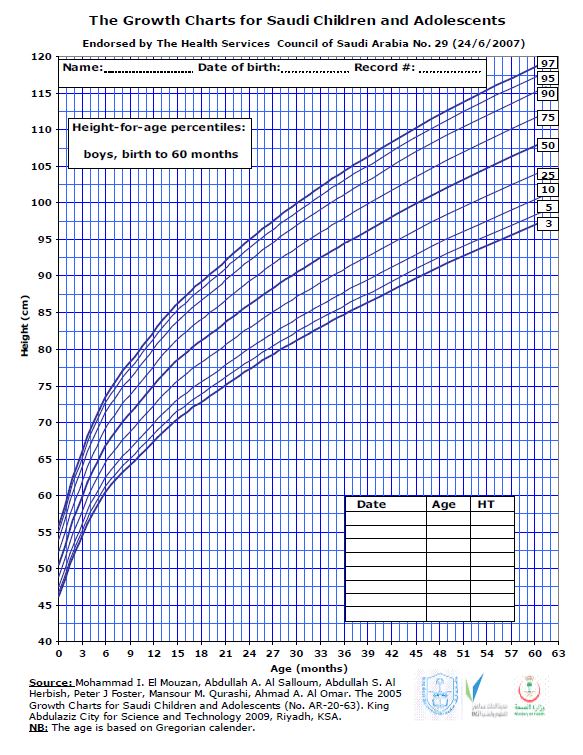


Appendix (4)


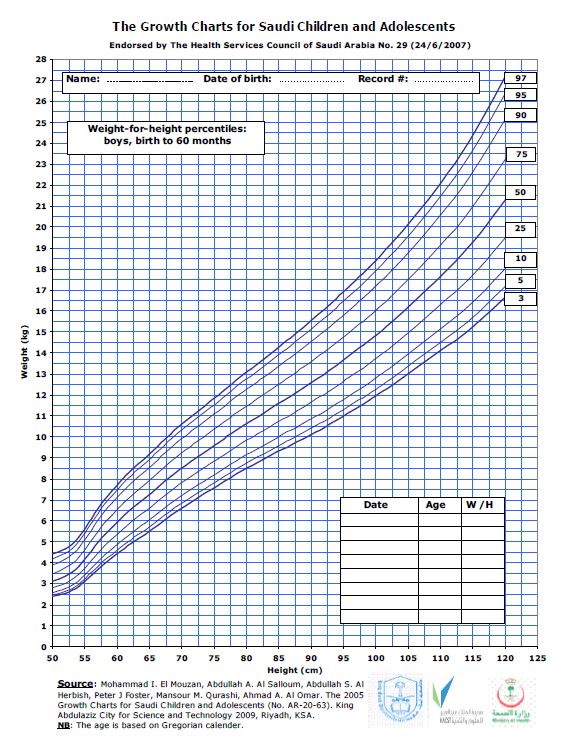


Appendix (5)


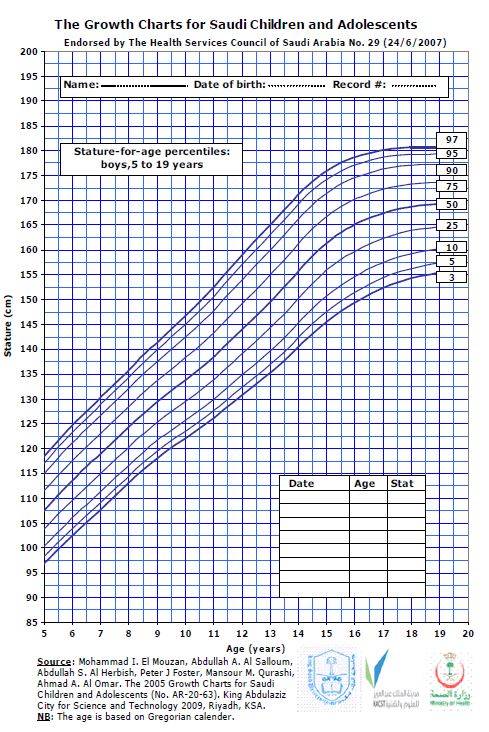


Appendix (6)

Appendix (7)
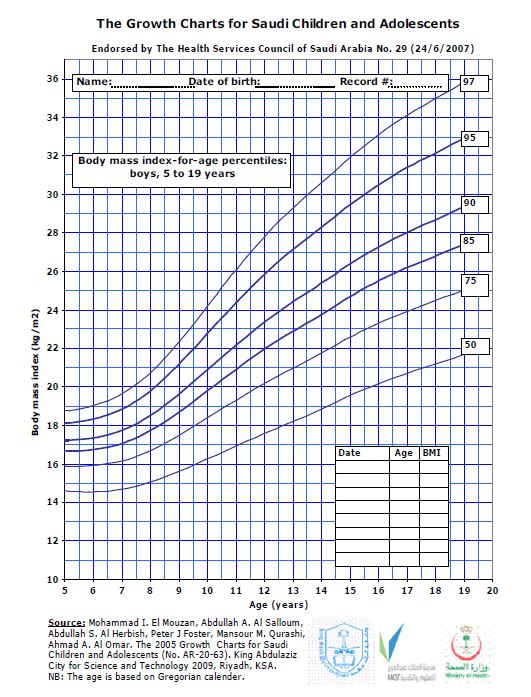


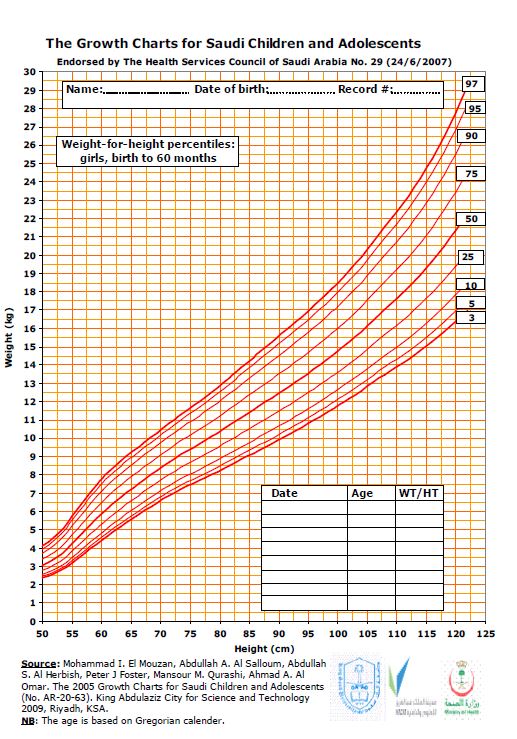

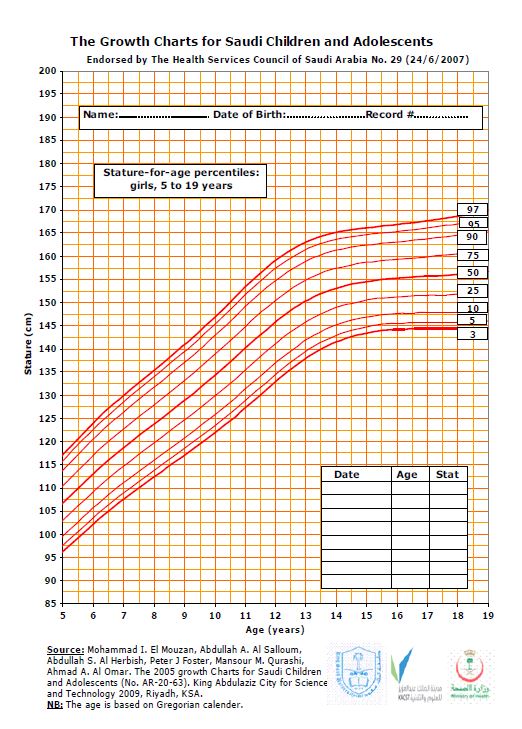

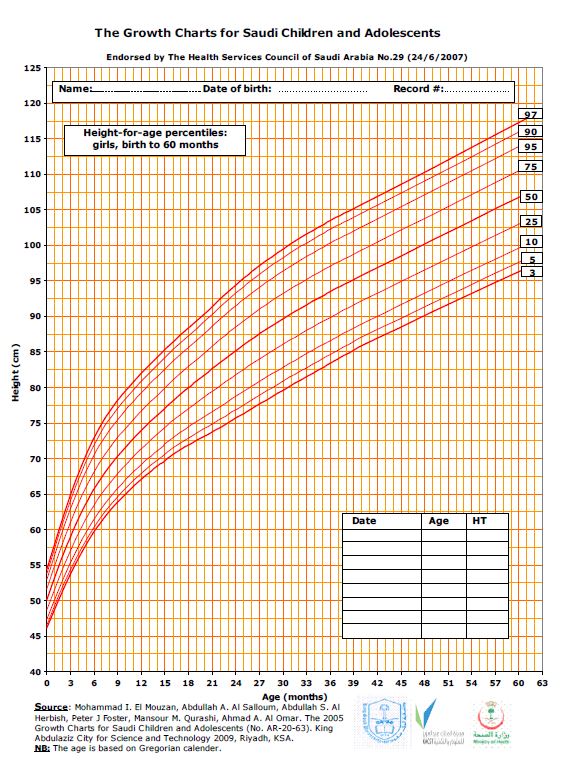


Appendix (8)


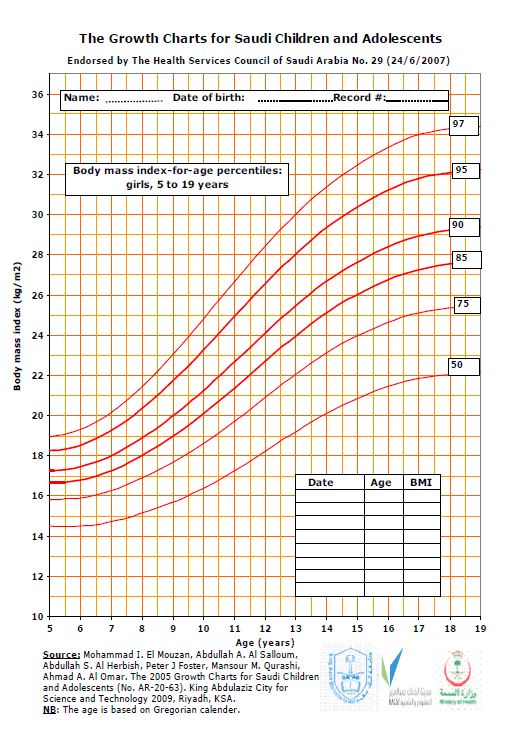


Appendix (9)


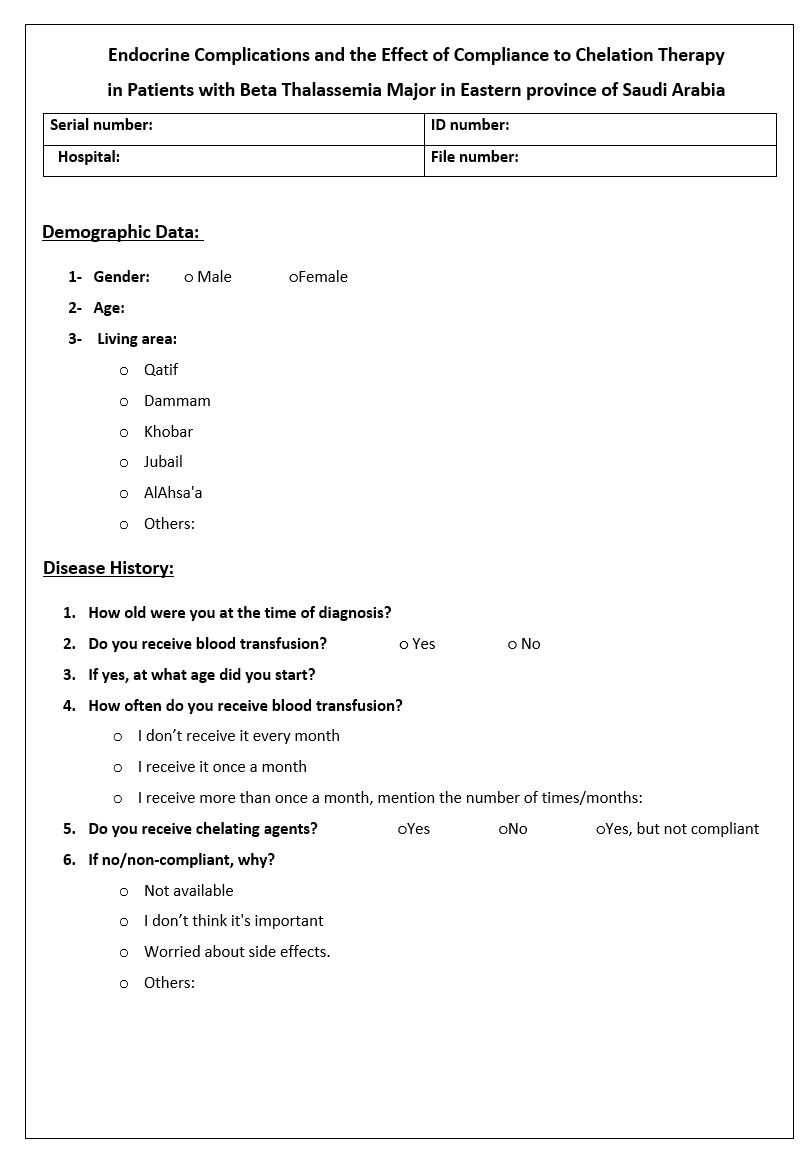
 Appendix (10)


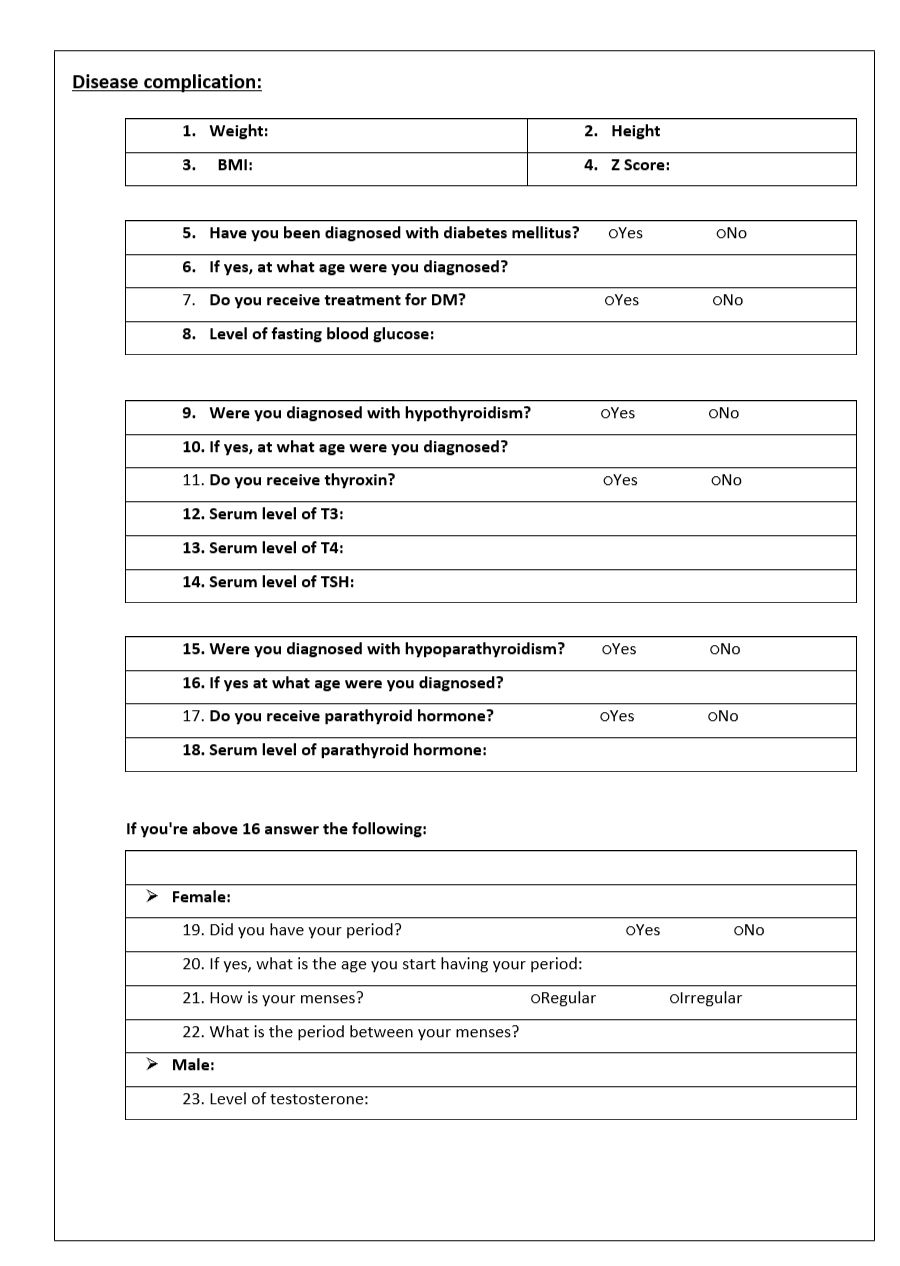
 Appendix (11)


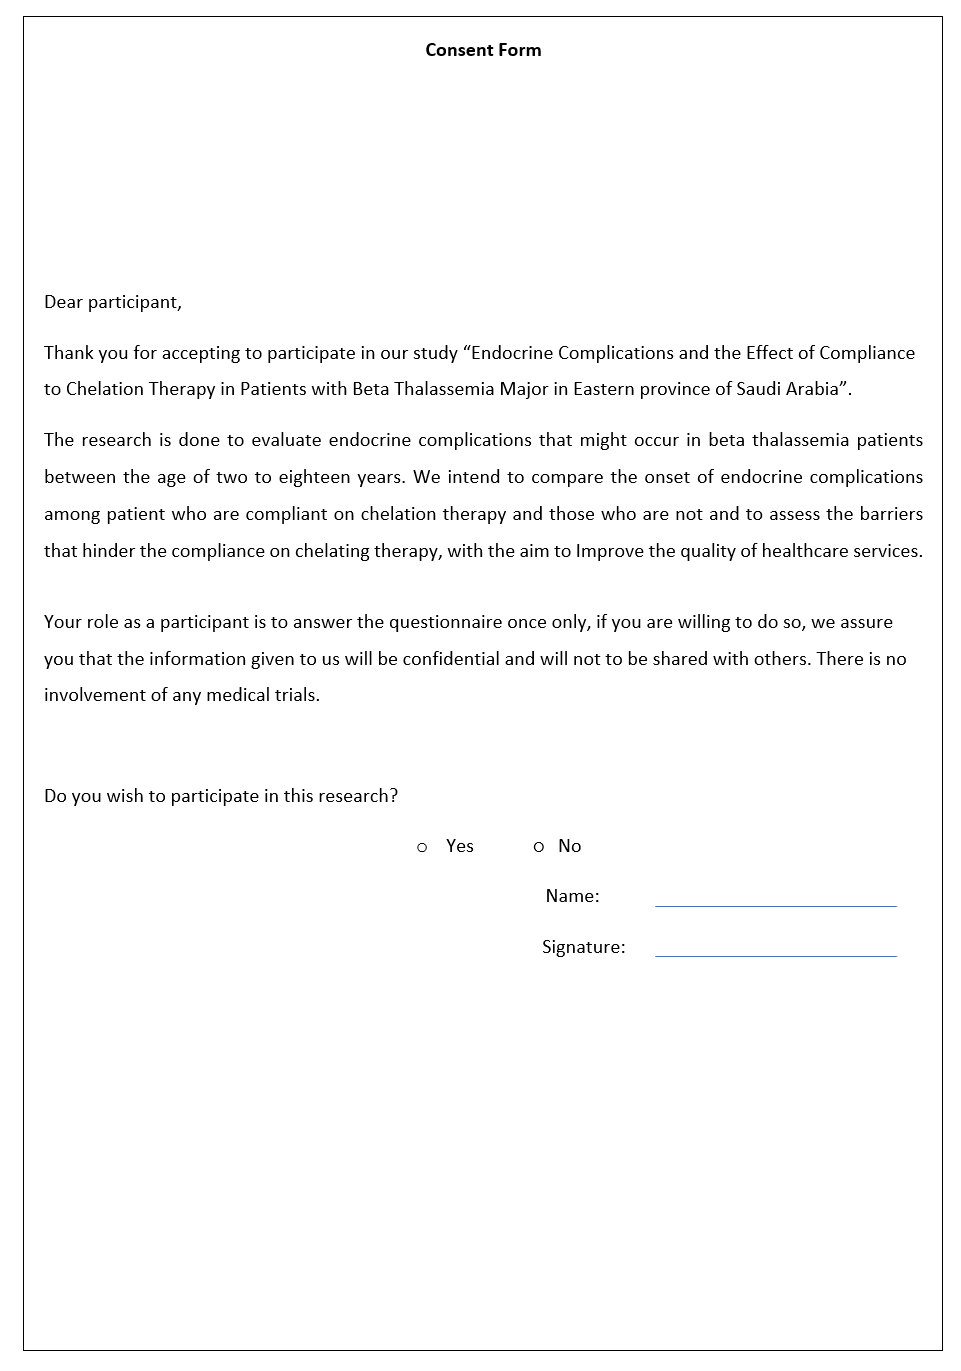
 Appendix (12)
